# Supplementary material for: The OTX2 Gene Induces Tumor Growth and Triggers Leptomeningeal Metastasis by Regulating the mTORC2 Signaling Pathway in Group 3 Medulloblastomas
Source: MDPI journal article supplement (doi:10.3390/ijms25084416), 2024-04-17
Supplement: s1 [file s1]

Table S1

|             | mTOR migratory genes                       |             |
|-------------|--------------------------------------------|-------------|
| Gene symbol | Protein name                               | Fold change |
| RHOH        | Ras homolog family member H                | 7.90302208  |
| TCTE1       | t-complex-associated-testis-expressed 1    | 5.03275079  |
| SPATA4      | Spermatogenesis associated 4               | 3.52173763  |
| FLT1        | Fms related receptor tyrosine kinase 1     | 3.21995989  |
| MYO5C       | Myosin VC                                  | 3.01310208  |
| RSPH3       | Radial spoke head 3                        | 2.91353403  |
| CAPG        | Capping actin protein, gelsolin like       | 2.89424259  |
| MEIG1       | Meiosis/spermiogenesis associated 1        | 2.67957714  |
| MID1        | Midline 1                                  | 2.61454996  |
| FNBP1L      | Formin binding protein 1 like              | 2.57540571  |
| ADAM8       | ADAM metallopeptidase domain 8             | 2.55443531  |
| STOX1       | Storkhead box 1                            | 2.48273568  |
| CLIP3       | CAP-Gly domain containing linker protein 3 | 2.46877779  |
| CDC42EP3    | CDC42 effector protein 3                   | 2.3729356   |
| SPIN1       | Spindlin 1                                 | 2.28779334  |
| EVI5        | Ecotropic viral integration site 5         | 2.27902084  |
| WDR66       | Cilia and flagella associated protein 251  | 2.22487289  |
| TRIP11      | Thyroid hormone receptor interactor 11     | 2.21789854  |
| LATS2       | Large tumor suppressor kinase 2            | 2.21493333  |
| BMF         | Bcl2 modifying factor                      | 2.21178766  |
| SLAIN1      | SLAIN motif family member 1                | 2.20076231  |
| CHMP4A      | Charged multivesicular body protein 4A     | 2.19732174  |
| RMDN2       | Regulator of microtubule dynamics 2        | 2.19429655  |
| RSPH4A      | Radial spoke head component 4A             | 2.1941541   |
| CCNB3       | Cyclin B3                                  | 2.17413257  |
| PFN4        | Profilin family member 4                   | 2.15908668  |
| FILIP1      | Filamin A interacting protein 1            | 2.14084054  |
| CLIP1       | CAP-Gly domain containing linker protein 1 | 2.13441998  |
| PGM5        | Phosphoglucomutase 5                       | 2.12866312  |
| IFT43       | Intraflagellar transport 43                | 2.11524978  |
| B9D2        | B9 domain containing 2                     | 2.11041237  |
| CALB1       | Calbindin 1                                | 2.10572869  |
| KIFAP3      | Kinesin associated protein 3               | 2.08948629  |
| RELB        | Proto-oncogene, NF-kB subunit              | 2.06572781  |

|               |                                                       |            |
|---------------|-------------------------------------------------------|------------|
| TFDP2         | Transcription factor Dp-2                             | 2.065508   |
| PDE4DIP       | Phosphodiesterase 4D                                  | 2.05145025 |
| FERMT2        | FERM domain containing kindlin 2                      | 2.01945389 |
| ENKUR         | Enkurin, TRPC channel interacting protein             | 2.01500987 |
| EFHB          | EF-hand domain family member B                        | 2.00936588 |
| BMERB1        | bMERB domain containing 1                             | 2.00881986 |
| TNNI1         | Troponin I1, slow skeletal type                       | 2.00711613 |
| CGN           | Cingulin                                              | 2.00588654 |
| TUBA3C        | Tubulin alpha 3c                                      | -3.3390037 |
| ABCA2         | ATP binding cassette subfamily A member 2             | -3.1385977 |
| SEPTIN1/44805 | Septin 1                                              | -3.0849846 |
| SHROOM2       | Shroom family member 2                                | -2.8106402 |
| PPL           | Periplakin                                            | -2.6933733 |
| ACTN2         | Actinin alpha 2                                       | -2.6319658 |
| DRD4          | Dopamine receptor D4                                  | -2.5231404 |
| SLC4A1        | Solute carrier family 4 member 1                      | -2.4951579 |
| XIRP2         | Xin actin binding repeat containing 2                 | -2.4635309 |
| LRRC45        | Leucine rich repeat containing 45                     | -2.4302219 |
| FSD1          | Fibronectin type III and SPRY domain containing 1     | -2.4090195 |
| TNNC2         | Troponin C2, fast skeletal type                       | -2.3479093 |
| ACTA1         | Actin alpha 1, skeletal muscle                        | -2.3340937 |
| MARVELD1      | MARVEL domain containing 1                            | -2.2974567 |
| RILP          | Rab interacting lysosomal protein                     | -2.289113  |
| DGKQ          | Diacylglycerol kinase theta                           | -2.2825598 |
| NPM3          | Nucleophosmin/nucleoplasmin 3                         | -2.2657574 |
| SYCE1L        | Synaptonemal complex central element protein 1 like   | -2.2118757 |
| CCDC124       | Coiled-coil domain containing 124                     | -2.2075697 |
| NUDT21        | Nudix hydrolase 21                                    | -2.1761027 |
| TEC           | Tec protein tyrosine kinase                           | -2.1715085 |
| HASPIN        | Histone H3 associated protein kinase                  | -2.1585964 |
| SPATC1L       | Spermatogenesis and centriole associated 1 like       | -2.1540213 |
| SYNPO         | Synaptopodin                                          | -2.143688  |
| ACADS         | acyl-CoA dehydrogenase short chain                    | -2.1406835 |
| DIXDC1        | DIX domain containing 1                               | -2.1274197 |
| HIP1R         | Huntingtin interacting protein 1 related              | -2.0924438 |
| MYH10         | Myosin heavy chain 10                                 | -2.090922  |
| HLA-DRB1      | Major histocompatibility complex, class II, DR beta 1 | -2.0796544 |
| LMNB2         | Lamin B2                                              | -2.0767632 |
| POC5          | POC5 centriolar protein                               | -2.0651481 |

|         |                                  |            |
|---------|----------------------------------|------------|
| BCL2L11 | BCL2 like 11                     | -2.0580241 |
| KIFC2   | Kinesin family member C2         | -2.0440324 |
| WHRN    | Whirlin                          | -2.023871  |
| MSRA    | Methionine sulfoxide reductase A | -2.0149004 |
| ACTR3B  | Actin related protein 3B         | -2.011168  |
| PRKCE   | Protein kinase C epsilon         | -2.003062  |

Table S2

| Name                                                     | Forward 5'-3'         | Reverse 5'-3'         |
|----------------------------------------------------------|-----------------------|-----------------------|
| Target of rapamycin kinase (MTOR)                        | CCTTAATTTGTTGCCCCGCT  | CCTCGCGTGCTGGACATC    |
| DEP domain containing MTOR interacting protein (DEPTOR)  | CGGCTGATGAGCCCTGA     | ATGTGTCCAACAAGCACCC   |
| Regulatory associated protein of MTOR complex 1 (PROTOR) | CGGCTGAGAGCATTGGACT   | GTGGACAGCGAGCTGGTG    |
| AKT1 substrate 1 (AKT1S1) (PRAS40)                       | CCACAGAGACAGAGACCTCC  | GAGTACAGATGATGGCAGCCT |
| MTOR associated protein, LST8 homolog (mLST8)            | GGATCTTCCAGGTGAACGCA  | CTCATCGTGGGTGACCAGAG  |
| RPTOR independent companion of MTOR complex 2 (RICTOR)   | TGTCACAACTGGGATGCTGT  | TTGGAGGATGACCGGTTTGG  |
| Proline rich 5 like (PRR5L) (Protor 2)                   | TCCCTACCCTGCAGGCAATA  | CAGAGTGTTACGAGCCCAC   |
| MAPK associated protein 1 (MAPKAP1) (mSin1)              | TCTACCTCCCTCTGCACTCG  | GGCTCATCTGCTGGCAGTAT  |
| AKT serine/threonine kinase 1 (AKT1)                     | GCGTGACCATGAACGAGTTT  | CACACACTCACCGAGAACCG  |
| AKT serine/threonine kinase 2 (AKT2)                     | GCAGAGATTGTCTCGGCTCT  | AAAACCTTCTGTGGGACCCC  |
| AKT serine/threonine kinase 3 (AKT3)                     | GGATGCCTCTACAACCCATCA | AGGATGAAGTGGCACACACT  |
| ras homolog family member H (RHOH)                       | ACAAGCCCACAGTGACGAG   | GCTACTCTGTGGCCAACCAT  |
| Myosin VC (MYO5C)                                        | CGCAGCTCTCTGTACTTGCT  | GCACAGAGCTACCCTTCCAG  |
| CDC42 effector protein 3 (CDC42EP3)                      | GCCAGTTCCTGGGCATAAT   | ACCATTGGAGGATCCCAAGC  |

Table S3

| Name           | Sequence 5'→3'       |                       |
|----------------|----------------------|-----------------------|
|                | Sense                | Antisense             |
| OTX1 si RNA #1 | GGAUAUGCUGGCUCAACUUt | AAGUUGAGCCAGCAUAUt    |
| OTX1 si RNA #2 | GGCUUCAGGUUAUAGUCAAt | UUGACUAUAACCUGAAGCCtg |
| mTOR siRNA #1  | CCCAGGUGUGAUCAAUAAUt | AUUAUUGAUCACACCUGGGtt |
| mTOR siRNA #2  | GGGCAUGAAUCGGGAUGAUt | AUCAUCCCGAUUCAUGCCCtt |
